# Supplementary material for: The effect of non-genetic determinants of human milk oligosaccharide profiles in milk of Ugandan mothers
Source: bioRxiv or medRxiv preprint supplement (doi:10.1101/2024.03.21.24304661), 2024-03-22
Supplement: Supplementary file [file media-1.pdf]

Title: Non-genetic mother-infant factors and Human milk oligossacharides composition/profile in breast milk of Ugandan mothers

First Author: Tonny Jimmy Owalla

**Supplementary Table 1: Median and Percent HMO concentrations**

| <b>HMO</b> | <b>All</b>     |          | <b>Secretors</b> |          | <b>Non-secretors</b> |          |
|------------|----------------|----------|------------------|----------|----------------------|----------|
|            | <b>nmol/mL</b> | <b>%</b> | <b>nmol/mL</b>   | <b>%</b> | <b>nmol/mL</b>       | <b>%</b> |
| 2'FL       | 5929.5         | 36.9     | 7099.7           | 42.5     | 31.7                 | 0.3      |
| LNFP II    | 1411.1         | 8.8      | 1140.5           | 6.8      | 2884.1               | 32.1     |
| LNT        | 1028.7         | 6.4      | 981.3            | 5.8      | 1330.7               | 14.8     |
| DFLNT      | 865.9          | 5.4      | 1215.9           | 7.3      | 619.0                | 6.9      |
| LNnT       | 805.2          | 5.0      | 789.1            | 4.7      | 870.1                | 9.7      |
| 3'SL       | 632.0          | 3.9      | 619.5            | 3.7      | 692.7                | 7.7      |
| LNFP I     | 599.3          | 3.7      | 1019.8           | 6.1      | 91.5                 | 1.0      |
| DFlac      | 548.4          | 3.4      | 666.0            | 4.0      | 56.1                 | 0.6      |
| DSLNT      | 417.2          | 2.6      | 404.4            | 2.4      | 429.3                | 4.8      |
| 3FL        | 378.9          | 2.4      | 397.7            | 2.4      | 189.3                | 2.1      |
| 6'SL       | 157.8          | 1.0      | 150.9            | 0.9      | 185.9                | 2.1      |
| FDSLNH     | 146.7          | 0.9      | 134.0            | 0.8      | 216.3                | 2.4      |
| LSTb       | 123.5          | 0.8      | 119.2            | 0.7      | 183.8                | 2.0      |
| LNH        | 71.2           | 0.4      | 68.6             | 0.4      | 80                   | 0.9      |
| LNFP III   | 70.0           | 0.4      | 63.5             | 0.4      | 93.8                 | 1.0      |
| LSTc       | 46.5           | 0.3      | 46.9             | 0.3      | 41.3                 | 0.5      |
| DSLNH      | 31.7           | 0.2      | 31.7             | 0.2      | 31.3                 | 0.3      |
| DFLNH      | 24.4           | 0.2      | 28.3             | 0.2      | 9.5                  | 0.1      |
| FLNH       | 24.2           | 0.2      | 25.8             | 0.2      | 21                   | 0.2      |
| Total HMO  | 16050.6        |          | 16699.2          |          | 8988.5               | 100      |
| Fuc HMO    | 15962.3        | 99.5     | 14641.2          | 87.7     | 5611.3               | 62.4     |
| Sial HMO   | 2395.0         | 14.9     | 2325.6           | 13.9     | 2984.1               | 33.2     |

HMOs = human milk oligosaccharides; nmol/mL = nanomoles/milliliter; % = percent

**Supplementary Table 2: Median (IQR) HMO concentrations and sex of children**

| <b>HMO<br/>nmol/mL</b> | <b>Total (N=114)</b>            | <b>Females (n=60)</b>           | <b>Males (n=54)</b>              | <b>Unadjusted<br/>p-value</b> |
|------------------------|---------------------------------|---------------------------------|----------------------------------|-------------------------------|
| 2'FL                   | 5961.3 (2365.5-<br>9364.7)      | 5961.3 (3086.9-<br>9616.9)      | 6069.2 (1660.3-<br>9271.8)       | 0.97                          |
| 3FL                    | 355.5 (263.8-<br>593.5)         | 371.2 (240.5-<br>536.2)         | 353.8 (289.4-<br>660.3)          | 0.35                          |
| LNnT,                  | 782.3 (578.2-<br>1042.6)        | 768.5 (582.9-<br>1037.4)        | 813.1 (567.9-<br>1093.1)         | 0.65                          |
| <b>3'SL</b>            | <b>614.1 (352.5-<br/>964.9)</b> | <b>516.6 (309.8-<br/>853.8)</b> | <b>701.8 (454.5-<br/>1059.8)</b> | <b>0.035</b>                  |
| DFLac                  | 493.2 (208.5-<br>832.6)         | 457.6 (281.9-<br>744.6)         | 557.0 (194.8-<br>961.2)          | 0.57                          |
| 6'SL                   | 154.0 (100.3-<br>276.4)         | 148.9 (101.3-<br>230.4)         | 183.0 (97.8-<br>297.8)           | 0.39                          |
| LNT                    | 1010.4 (702.1-<br>1618.0)       | 982.2 (730.7-<br>1513.2)        | 1076.7 (659.6-<br>1704.2)        | 0.88                          |
| LNFP I                 | 623.9 (169.2-<br>1863.9)        | 729.9 (224.4-<br>2039.1)        | 455.8 (169.2-<br>1781.5)         | 0.64                          |
| LNFP II                | 1393.9 (721.0-<br>2582.7)       | 1359.6 (759.1-<br>2613.2)       | 1476.8 (599.7-<br>2529.6)        | 0.73                          |
| LNFP III               | 71.0 (55.0-88.8)                | 65.0 (54.2-84.6)                | 75.0 (58.9-93.2)                 | 0.14                          |
| LSTb                   | 123.3 (94.8-<br>182.2)          | 123.3 (101.3-<br>178.7)         | 124.7 (83.3-<br>182.2)           | 0.62                          |
| LSTc,                  | 43.1 (22.2-92.4)                | 41.8 (23.4-72.3)                | 45.8 (21.4-104.3)                | 0.71                          |
| DFLNT                  | 837.2 (106.0-<br>1609.2)        | 837.2 (129.8-<br>1666.7)        | 868.0 (80.4-<br>1544.0)          | 0.97                          |
| LNH                    | 67.8 (37.2-107.4)               | 74.8 (41.6-125.0)               | 60.7 (30.7-82.9)                 | 0.16                          |

Title: Non-genetic mother-infant factors and Human milk oligossacharides composition/profile in breast milk of Ugandan mothers

First Author: Tonny Jimmy Owalla

|           |                                  |                                  |                                  |      |
|-----------|----------------------------------|----------------------------------|----------------------------------|------|
| DSLNT     | 425.8 (280.5-<br>515.5)          | 377.7 (280.6-<br>476.5)          | 443.6 (274.3-<br>585.6)          | 0.12 |
| FLNH      | 24.0 (13.2-52.0)                 | 25.3 (13.1-50.9)                 | 23.7 (13.2-58.5)                 | 0.86 |
| DFLNH     | 25.6 (10.1-66.1)                 | 26.6 (10.5-66.1)                 | 25.1 (9.3-66.1)                  | 0.86 |
| FDSLNH    | 144.7 (21.1-<br>290.3)           | 171.5 (16.9-<br>313.6)           | 102.2 (23.1-<br>237.9)           | 0.54 |
| DSLNH     | 26.1 (11.1-63.7)                 | 24.3 (7.8-81.0)                  | 30.9 (12.0-62.5)                 | 0.95 |
| Total HMO | 16021.3<br>(12674.9-<br>17668.9) | 15804.3<br>(12947.1-<br>17249.5) | 16174.0<br>(12197.8-<br>18096.5) | 0.43 |
| Sia HMO   | 13985.2<br>(10010.4-<br>15618.4) | 13756.7<br>(9913.9-15226.6)      | 14186.8<br>(10517.4-<br>16252.6) | 0.49 |
| Fuc HMO   | 2388.4 (1965.7-<br>3032.4)       | 2322.1 (1836.1-<br>2861.0)       | 2403.0 (2026.4-<br>3305.9)       | 0.17 |
| Diversity | 4.7 (3.0-5.9)                    | 4.7 (3.0-6.0)                    | 4.7 (3.0-5.9)                    | 0.96 |

IQR = interquartile range; HMOs = human milk oligosaccharides; N = total number of mothers with available information about the sex of their children; data on sex was not available for 13 children; n = number of females or males. HMO with significant unadjusted p value is in bold.

Title: Non-genetic mother-infant factors and Human milk oligossacharides composition/profile in breast milk of Ugandan mothers

First Author: Tonny Jimmy Owalla

**Supplementary Table 3: Correlations between HMO concentrations and lactation duration**

| HMOs<br>nmol/mL | All, N= 127    |                       | Secretor, n=101 |                       | Non Secretor, n= 26 |                       |
|-----------------|----------------|-----------------------|-----------------|-----------------------|---------------------|-----------------------|
|                 | Coef.<br>(rho) | Unadjusted<br>p-value | Coef.<br>(rho)  | Unadjusted<br>p-value | Coef.<br>(rho)      | Unadjusted<br>p-value |
| 2'FL            | 0.0479         | 0.5925                | 0.0729          | 0.4686                | 0.2652              | 0.1904                |
| <b>3FL</b>      | <b>0.3551</b>  | <b>&lt;0.0001</b>     | <b>0.3626</b>   | <b>0.0002</b>         | 0.3802              | 0.0554                |
| <b>LNnT,</b>    | <b>-0.3680</b> | <b>&lt;0.0001</b>     | <b>-0.4188</b>  | <b>&lt;0.0001</b>     | -0.2440             | 0.2297                |
| <b>3'SL</b>     | <b>0.4104</b>  | <b>&lt;0.0001</b>     | <b>0.3378</b>   | <b>0.0006</b>         | <b>0.7062</b>       | <b>0.0001</b>         |
| <b>DFLac</b>    | <b>0.2740</b>  | <b>0.0018</b>         | <b>0.4214</b>   | <b>&lt;0.0001</b>     | <b>0.5195</b>       | <b>0.0065</b>         |
| <b>6'SL</b>     | <b>-0.6915</b> | <b>&lt;0.0001</b>     | <b>-0.6586</b>  | <b>&lt;0.0001</b>     | <b>-0.8010</b>      | <b>&lt;0.0001</b>     |
| <b>LNT</b>      | <b>-0.1993</b> | <b>0.0247</b>         | -0.1919         | 0.0545                | -0.2785             | 0.1683                |
| LNFP I          | <b>-0.2133</b> | <b>0.0160</b>         | <b>-0.3105</b>  | <b>0.0016</b>         | 0.0544              | 0.7918                |
| LNFP II         | 0.1097         | 0.2194                | <b>0.2002</b>   | <b>0.0448</b>         | -0.0400             | 0.8460                |
| LNFP III        | -0.0596        | 0.5056                | -0.0545         | 0.5881                | -0.0127             | 0.9510                |
| LSTb            | 0.0087         | 0.9226                | -0.0250         | 0.8043                | 0.1417              | 0.4900                |
| <b>LSTc</b>     | <b>-0.6630</b> | <b>&lt;0.0001</b>     | <b>-0.6429</b>  | <b>&lt;0.0001</b>     | <b>-0.7343</b>      | <b>&lt;0.0001</b>     |
| DFLNT           | -0.1125        | 0.2080                | -0.1406         | 0.1607                | 0.1649              | 0.4207                |
| <b>LNH</b>      | <b>-0.2756</b> | <b>0.0017</b>         | <b>-0.2100</b>  | <b>0.0350</b>         | <b>-0.4660</b>      | <b>0.0164</b>         |
| DSLNT           | -0.0346        | 0.6994                | -0.1501         | 0.1340                | <b>0.3904</b>       | <b>0.0486</b>         |
| <b>FLNH</b>     | <b>-0.3090</b> | <b>0.0004</b>         | <b>-0.3334</b>  | <b>0.0007</b>         | -0.1393             | 0.4975                |
| <b>DFLNH</b>    | <b>-0.2411</b> | <b>0.0063</b>         | <b>-0.2860</b>  | <b>0.0037</b>         | -0.0339             | 0.8694                |
| FDSLNH          | -0.0427        | 0.6333                | 0.0994          | 0.3226                | <b>-0.4722</b>      | <b>0.0149</b>         |
| <b>DSLNH</b>    | <b>-0.5310</b> | <b>&lt;0.0001</b>     | <b>-0.5026</b>  | <b>&lt;0.0001</b>     | <b>-0.6223</b>      | <b>0.0007</b>         |
| Total HMO       | -0.0183        | 0.8383                | 0.0070          | 0.9450                | -0.1718             | 0.4014                |
| Fuc HMO         | 0.0937         | 0.2948                | 0.1691          | 0.0909                | 0.0366              | 0.8591                |
| Sia HMO         | -0.0631        | 0.4806                | -0.0709         | 0.4811                | -0.0106             | 0.9590                |
| Diversity       | -0.0989        | 0.2687                | -0.1030         | 0.3056                | -0.1271             | 0.5362                |

Coef (rho) = Spearman's correlation coefficient. HMOs = human milk oligosaccharides; nmol/mL = nanomoles/milliliter; N = total number of mothers; n = number of secretors or non-secretors. HMOs with significant unadjusted p value are in bold.

Title: Non-genetic mother-infant factors and Human milk oligossacharides composition/profile in breast milk of Ugandan mothers

First Author: Tonny Jimmy Owalla

**Supplementary Table 4: Correlations between HMO concentrations and maternal age**

| HMOs<br>nmol/mL | All, N= 126    |                       | Secretor, N= 100 |                       | Non-Secretor, N= 26 |                       |
|-----------------|----------------|-----------------------|------------------|-----------------------|---------------------|-----------------------|
|                 | Coef.<br>(rho) | Unadjusted<br>p-value | Coef.<br>(rho)   | Unadjusted<br>p-value | Coef.<br>(rho)      | Unadjusted<br>p-value |
| <b>2'FL</b>     | 0.0410         | 0.6488                | 0.1228           | 0.2235                | <b>0.4584</b>       | <b>0.0185</b>         |
| 3FL             | 0.0737         | 0.4124                | 0.1500           | 0.1363                | -0.0646             | 0.7539                |
| <b>LNnT</b>     | <b>-0.2213</b> | <b>0.0128</b>         | <b>-0.3040</b>   | <b>0.0021</b>         | 0.0357              | 0.8624                |
| 3'SL            | 0.1753         | 0.0505                | 0.1302           | 0.1989                | 0.3591              | 0.0716                |
| <b>DFLac</b>    | 0.0537         | 0.5505                | 0.1403           | 0.1639                | <b>0.4506</b>       | <b>0.0209</b>         |
| 6'SL            | -0.0344        | 0.7024                | -0.0409          | 0.6862                | -0.0351             | 0.8650                |
| LNT             | -0.1152        | 0.1989                | -0.1559          | 0.1214                | -0.0213             | 0.9177                |
| LNFP I          | -0.0767        | 0.3933                | -0.0103          | 0.9192                | -0.3560             | 0.0742                |
| LNFP II         | -0.0080        | 0.9288                | 0.0090           | 0.9292                | -0.1625             | 0.4276                |
| LNFP III        | 0.0556         | 0.5362                | 0.0313           | 0.7569                | -0.0653             | 0.7513                |
| LSTb            | -0.0153        | 0.8651                | -0.0632          | 0.5324                | 0.2285              | 0.2615                |
| LSTc            | -0.0684        | 0.4468                | -0.0925          | 0.3602                | 0.0502              | 0.8077                |
| DFLNT           | -0.1103        | 0.2188                | -0.0844          | 0.4038                | -0.0443             | 0.8297                |
| LNH             | -0.1639        | 0.0667                | -0.1699          | 0.0911                | -0.1966             | 0.3358                |
| <b>DSLNT</b>    | -0.0673        | 0.4542                | <b>-0.2181</b>   | <b>0.0293</b>         | <b>0.4612</b>       | <b>0.0177</b>         |
| FLNH            | -0.0372        | 0.6790                | -0.0628          | 0.5348                | 0.1887              | 0.3560                |
| DFLNH           | 0.0895         | 0.3190                | 0.1379           | 0.1713                | 0.0160              | 0.9382                |
| FDSLNH          | 0.0531         | 0.5551                | 0.0798           | 0.4300                | -0.1378             | 0.5020                |
| DSLNH           | -0.0254        | 0.7779                | -0.0335          | 0.7411                | 0.0184              | 0.9290                |
| Total HMO       | 0.0343         | 0.7030                | 0.1344           | 0.1826                | 0.0818              | 0.6912                |
| <b>Fuc HMO</b>  | 0.0957         | 0.2863                | <b>0.2423</b>    | <b>0.0151</b>         | -0.0704             | 0.7324                |
| Sia HMO         | -0.0093        | 0.9177                | -0.1060          | 0.2941                | 0.2598              | 0.1999                |
| Diversity       | -0.1091        | 0.2240                | -0.1425          | 0.1572                | -0.0637             | 0.7571                |

Coef (rho) = Spearman's correlation coefficient. HMOs = human milk oligosaccharides; nmol/mL = nanomoles/milliliter; N = total number of mothers; n = number of secretors or non-secretors. HMOs with significant unadjusted p value are in bold.

Title: Non-genetic mother-infant factors and Human milk oligossacharides composition/profile in breast milk of Ugandan mothers

First Author: Tonny Jimmy Owalla

**Supplementary Table 5: Median (IQR) HMO concentrations and maternal age**

| <b>HMOs</b>   | <b>Total (N=127)</b>        | <b>&gt;18 years (n=123)</b> | <b>≤ 18years (n=4)</b>        | <b>Unadjusted p-value</b> |
|---------------|-----------------------------|-----------------------------|-------------------------------|---------------------------|
| 2'FL          | 5912.6 (2715.8-9271.8)      | 5822.8 (2452.3-9279.6)      | 7181.2 (5115.1-8249.1)        | 0.73                      |
| 3FL           | 375.4 (263.8-593.5)         | 384.4 (263.8-606.8)         | 324.9 (257.7-380.7)           | 0.43                      |
| LNnT          | 797.2 (578.2-1033.2)        | 775.1 (567.9-1033.2)        | 966.2 (872.0-1497.4)          | 0.12                      |
| 3'SL          | 630.0 (353.4-985.9)         | 640.2 (364.9-987.8)         | 434.3 (303.9-545.7)           | 0.18                      |
| DFLac         | 546.5 (287.0-838.1)         | 546.5 (231.6-881.5)         | 582.7 (385.4-722.3)           | 0.92                      |
| 6'SL          | 158.5 (102.5-270.9)         | 156.6 (102.5-263.3)         | 480.3 (272.6-909.2)           | 0.10                      |
| LNT           | 1039.5 (702.1-1618.0)       | 1039.5 (694.8-1531.9)       | 1267.2 (834.4-2033.7)         | 0.48                      |
| <b>LNFP I</b> | <b>609.7 (172.6-1863.9)</b> | <b>579.4 (169.2-1846.9)</b> | <b>2279.7 (1137.6-3344.6)</b> | <b>0.050</b>              |
| LNFP II       | 1393.9 (721.0-2551.2)       | 1419.6 (735.3-2551.2)       | 360.8 (147.4-1569.8)          | 0.23                      |
| LNFP III      | 70.5 (55.4-88.8)            | 70.5 (57.1-89.8)            | 60.3 (45.2-74.1)              | 0.28                      |
| LSTb          | 123.3 (90.8-182.2)          | 123.2 (89.1-181.9)          | 202.0 (113.5-291.4)           | 0.19                      |
| LSTc          | 46.6 (24.8-93.3)            | 45.7 (24.8-87.9)            | 201.3 (70.3-690.2)            | 0.11                      |
| DFLNT         | 852.8 (122.3-1544.0)        | 852.8 (122.3-1526.3)        | 1085.4 (190.7-1916.3)         | 0.68                      |
| LNH           | 70.7 (37.7-105.2)           | 71.5 (38.2-106.4)           | 28.5 (24.6-61.9)              | 0.16                      |

Title: Non-genetic mother-infant factors and Human milk oligossacharides composition/profile in breast milk of Ugandan mothers

First Author: Tonny Jimmy Owalla

| <b>DSLNT</b> | <b>412.1 (274.3-512.6)</b>   | <b>400.9 (271.0-504.0)</b>   | <b>641.2 (600.7-922.3)</b>   | <b>0.009</b> |
|--------------|------------------------------|------------------------------|------------------------------|--------------|
| FLNH         | 24.2 (13.2-52.0)             | 24.0 (13.2-52.0)             | 28.3 (17.7-70.8)             | 0.80         |
| DFLNH        | 24.5 (9.4-66.1)              | 23.5 (9.3-66.1)              | 34.3 (26.9-100.3)            | 0.24         |
| FDSLNH       | 146.9 (21.1-310.1)           | 157.5 (21.2-311.1)           | 31.3 (14.9-106.7)            | 0.16         |
| DSLNH        | 32.1 (11.6-64.5)             | 32.1 (11.6-64.5)             | 35.5 (15.3-219.8)            | 0.68         |
| Total HMO    | 16021.3<br>(13219.4-17668.9) | 15907.3<br>(13190.4-17550.4) | 17502.3<br>(15383.9-18768.4) | 0.22         |
| Sia HMO      | 13925.6<br>(10903.9-15947.2) | 13925.6<br>(10517.4-15947.2) | 13607.5<br>(11691.6-15523.7) | 0.97         |
| Fuc HMO      | 2388.4 (1995.9-3149.7)       | 2381.0 (1977.8-3114.2)       | 3202.3 (2500.3-4456.0)       | 0.10         |
| Diversity    | 4.7 (3.1-6.0)                | 4.7 (3.0-6.0)                | 4.8 (3.6-6.5)                | 0.52         |

IQR = interquartile range; HMOs = human milk oligosaccharides; N = total number of mothers; n = number of mothers in each age category. HMOs with significant unadjusted p values are in bold.

Title: Non-genetic mother-infant factors and Human milk oligossacharides composition/profile in breast milk of Ugandan mothers

First Author: Tonny Jimmy Owalla

**Supplementary Table 6: Median (IQR) HMO concentrations and maternal parity**

| HMOs<br>nmol/mL | Total (N=127)                   | Parity=1 (n=27)                 | Parity >1 (n=100)               | Unadjusted<br>p-value |
|-----------------|---------------------------------|---------------------------------|---------------------------------|-----------------------|
| 2'FL            | 5929.5 (2715.8-<br>9271.8)      | 6242.8 (624.9-<br>8908.1)       | 5912.6 (3799.2-<br>9275.7)      | 0.56                  |
| 3FL             | 378.9 (263.8-<br>606.8)         | 327.1 (221.0-<br>406.1)         | 401.0 (265.2-<br>632.7)         | 0.076                 |
| LNnT            | 805.2 (578.2-<br>1033.5)        | 894.2 (594.1-<br>1141.3)        | 790.0 (573.0-<br>1032.7)        | 0.28                  |
| 3'SL            | 632.0 (353.4-<br>987.8)         | 413.1 (295.2-<br>985.9)         | 700.6 (403.4-<br>1016.9)        | 0.072                 |
| <b>DFLac</b>    | <b>548.4 (287.0-<br/>881.5)</b> | <b>399.3 (158.4-<br/>698.6)</b> | <b>594.8 (365.0-<br/>937.9)</b> | <b>0.018</b>          |
| 6'SL            | 157.8 (102.2-<br>270.9)         | 182.2 (86.3-569.7)              | 155.1 (102.8-<br>253.6)         | 0.38                  |
| LNT             | 1028.7 (694.8-<br>1618.0)       | 1106.3 (752.7-<br>1747.0)       | 1026.5 (666.2-<br>1473.4)       | 0.65                  |
| LNFP I          | 599.3 (172.6-<br>1863.9)        | 1080.8 (117.9-<br>2066.2)       | 529.4 (212.1-<br>1730.5)        | 0.44                  |
| LNFP II         | 1411.1 (721.0-<br>2551.2)       | 1580.5 (107.9-<br>2766.3)       | 1393.9 (787.8-<br>2495.3)       | 0.77                  |
| LNFP III        | 70.0 (55.0-88.8)                | 68.4 (44.9-82.5)                | 73.9 (58.8-93.2)                | 0.11                  |
| LSTb            | 123.5 (90.8-<br>182.2)          | 134.5 (87.6-184.4)              | 122.3 (92.8-181.8)              | 0.51                  |
| LSTc            | 46.5 (24.3-93.3)                | 63.7 (18.5-140.8)               | 43.1 (25.2-75.1)                | 0.19                  |
| DFLNT           | 865.9 (122.3-<br>1576.6)        | 802.1 (121.3-<br>1705.9)        | 993.8 (126.1-<br>1560.3)        | 0.91                  |
| LNH             | 71.2 (37.7-106.4)               | 68.6 (23.0-104.0)               | 71.8 (41.6-107.8)               | 0.40                  |
| DSLNT           | 417.2 (274.3-<br>512.6)         | 454.3 (287.3-<br>633.3)         | 412.1 (268.7-<br>501.5)         | 0.30                  |



Title: Non-genetic mother-infant factors and Human milk oligossacharides composition/profile in breast milk of Ugandan mothers

First Author: Tonny Jimmy Owalla

|           |                           |                           |                           |      |
|-----------|---------------------------|---------------------------|---------------------------|------|
| FLNH      | 24.2 (13.2-57.0)          | 20.5 (8.3-35.6)           | 24.5 (13.6-59.5)          | 0.23 |
| DFLNH     | 24.4 (9.4-66.1)           | 16.9 (9.0-32.8)           | 26.1 (10.1-74.3)          | 0.21 |
| FDSLNH    | 146.7 (21.1-310.1)        | 123.9 (15.8-337.3)        | 157.7 (25.5-302.0)        | 0.39 |
| DSLNH     | 31.7 (11.6-64.5)          | 30.7 (6.5-65.8)           | 32.1 (12.7-64.1)          | 0.98 |
| Total HMO | 16050.6 (13219.4-17668.9) | 15755.6 (10981.1-17187.8) | 16125.7 (13379.3-17682.1) | 0.73 |
| Sia HMO   | 13962.3 (10903.9-15966.1) | 13381.6 (7401.8-15258.1)  | 14117.4 (11166.4-16134.6) | 0.22 |
| Fuc HMO   | 2395.0 (1995.9-3149.7)    | 2398.6 (1795.0-3301.5)    | 2388.4 (1995.9-3022.9)    | 0.76 |
| Diversity | 4.7 (3.1-6.0)             | 4.3 (3.1-6.0)             | 4.7 (3.1-6.0)             | 0.91 |

IQR = interquartile range; HMOs = human milk oligosaccharides; N = total number of mothers; n = number of mothers in each parity category. HMO with a significant unadjusted p value is in bold.

Title: Non-genetic mother-infant factors and Human milk oligossacharides composition/profile in breast milk of Ugandan mothers

First Author: Tonny Jimmy Owalla

**Supplementary Table 7: Correlations between HMOs and maternal post-partum BMI**

| HMO<br>nmol/mL | All, N= 113    |                       | Secretor, n= 89 |                       | Non-Secretor, n= 24 |                       |
|----------------|----------------|-----------------------|-----------------|-----------------------|---------------------|-----------------------|
|                | Coef.<br>(rho) | Unadjusted<br>p-value | Coef.<br>(rho)  | Unadjusted<br>p-value | Coef.<br>(rho)      | Unadjusted<br>p-value |
| 2'FL           | -0.0547        | 0.5651                | -0.0662         | 0.5376                | -0.1283             | 0.5502                |
| 3FL            | 0.0184         | 0.8469                | 0.0502          | 0.6401                | -0.1313             | 0.5407                |
| LNnT           | -0.0266        | 0.7794                | -0.0219         | 0.8386                | -0.0565             | 0.7930                |
| 3'SL           | 0.1361         | 0.1525                | 0.1700          | 0.1134                | -0.0291             | 0.8925                |
| DFLac          | 0.0255         | 0.7888                | 0.0580          | 0.5890                | -0.0726             | 0.7359                |
| 6'SL           | 0.0088         | 0.9259                | -0.0310         | 0.7733                | 0.2392              | 0.2603                |
| LNT            | 0.0521         | 0.5837                | 0.0123          | 0.9092                | 0.1913              | 0.3704                |
| LNFP I         | -0.0848        | 0.3717                | -0.1091         | 0.3090                | -0.0939             | 0.6624                |
| LNFP II        | 0.0703         | 0.4594                | 0.1374          | 0.1992                | -0.1366             | 0.5246                |
| LNFP III       | 0.0667         | 0.4824                | 0.0805          | 0.4534                | -0.0992             | 0.6448                |
| LSTb           | -0.0196        | 0.8364                | 0.0308          | 0.7745                | -0.1992             | 0.3508                |
| LSTc           | -0.0279        | 0.7695                | -0.0249         | 0.8171                | -0.0918             | 0.6698                |
| DFLNT          | -0.0965        | 0.3093                | -0.1180         | 0.2709                | -0.2231             | 0.2947                |
| <b>LNH</b>     | -0.1641        | 0.0824                | -0.0917         | 0.3926                | <b>-0.4188</b>      | <b>0.0417</b>         |
| DSLNT          | 0.0017         | 0.9855                | -0.0297         | 0.7824                | 0.0952              | 0.6580                |
| FLNH           | -0.0383        | 0.6868                | -0.0084         | 0.9380                | -0.2092             | 0.3266                |
| DFLNH          | -0.0217        | 0.8194                | -0.0066         | 0.9512                | -0.1653             | 0.4401                |
| <b>FDSLNH</b>  | 0.1107         | 0.2431                | <b>0.2126</b>   | <b>0.0454</b>         | -0.2405             | 0.2577                |
| DSLNH          | -0.0712        | 0.4538                | -0.0718         | 0.5035                | -0.1131             | 0.5988                |
| Total HMO      | -0.0234        | 0.8059                | -0.0108         | 0.9200                | -0.2592             | 0.2213                |
| Fuc HMO        | -0.0649        | 0.4944                | -0.0946         | 0.3777                | -0.0822             | 0.7026                |
| Sia HMO        | 0.0718         | 0.4500                | 0.1272          | 0.2348                | -0.2283             | 0.2833                |
| Diversity      | 0.0311         | 0.7439                | 0.0585          | 0.5860                | -0.1864             | 0.3833                |

Coef (rho) = Spearman's correlation coefficient. HMO = human milk oligosaccharides; nmol/mL = nanomoles/milliliter; N = total number of mothers with BMI data available; height or weight data were unavailable for 14 mothers; n = number of secretors or non-secretors. HMOs with significant unadjusted p values are in bold.

Title: Non-genetic mother-infant factors and Human milk oligossacharides composition/profile in breast milk of Ugandan mothers

First Author: Tonny Jimmy Owalla

**Supplementary Table 8: Median (IQR) HMO concentrations and Maternal post-partum BMI in Secretor Mothers**

| <b>HMO<br/>nmol/mL</b> | <b>Total (N=101)</b>       | <b>Normal (n=82)</b>       | <b>Overweight<br/>(n=19)</b> | <b>Unadjusted<br/>p-value</b> |
|------------------------|----------------------------|----------------------------|------------------------------|-------------------------------|
| 2'FL                   | 7059.5 (4978.3-<br>9808.0) | 7215.0 (4991.9-<br>9774.8) | 6242.8 (4468.4-<br>10037.1)  | 0.43                          |
| 3FL                    | 399.2 (294.5-<br>632.7)    | 400.8 (297.8-<br>633.6)    | 370.5 (212.5-543.2)          | 0.32                          |
| LNnT                   | 797.2 (558.8-<br>1033.4)   | 805.2 (594.1-<br>1033.5)   | 774.7 (439.5-<br>1026.8)     | 0.46                          |
| 3'SL                   | 624.8 (346.2-<br>916.9)    | 630.0 (364.9-<br>916.3)    | 528.1 (309.0-958.8)          | 0.71                          |
| DFLac                  | 658.6 (451.6-<br>1041.7)   | 698.6 (457.1-<br>1128.3)   | 480.8 (404.8-888.2)          | 0.28                          |
| 6'SL                   | 150.7 (99.0-<br>270.9)     | 150.5 (97.8-<br>263.3)     | 150.9 (107.7-320.8)          | 0.70                          |
| LNT                    | 989.0 (649.9-<br>1473.4)   | 964.4 (653.7-<br>1395.3)   | 1106.3 (485.9-<br>1625.3)    | 0.78                          |
| LNFP I                 | 974.5 (387.9-<br>2112.2)   | 845.0 (382.9-<br>2090.4)   | 1230.9 (537.4-<br>2133.9)    | 0.80                          |
| LNFP II                | 1154.3 (558.1-<br>2089.4)  | 1106.0 (535.5-<br>2085.7)  | 1580.5 (897.6-<br>2273.7)    | 0.22                          |
| LNFP III               | 63.3 (49.3-81.6)           | 63.5 (52.4-81.2)           | 61.7 (45.0-88.0)             | 0.73                          |
| LSTb                   | 119.4 (85.6-<br>159.0)     | 119.2 (87.4-<br>142.8)     | 126.4 (65.7-216.6)           | 0.61                          |
| LSTc                   | 46.8 (23.9-95.2)           | 46.7 (23.3-77.2)           | 58.3 (31.5-137.3)            | 0.31                          |
| DFLNT                  | 1223.6 (128.0-<br>1739.9)  | 1313.1 (190.2-<br>1815.0)  | 144.8 (78.7-1421.5)          | 0.14                          |
| LNH                    | 69.4 (37.6-97.9)           | 73.2 (37.2-103.1)          | 51.3 (41.2-83.7)             | 0.38                          |

Title: Non-genetic mother-infant factors and Human milk oligossacharides composition/profile in breast milk of Ugandan mothers

First Author: Tonny Jimmy Owalla

|               |                           |                           |                            |              |
|---------------|---------------------------|---------------------------|----------------------------|--------------|
| DSLNT         | 405.7 (261.4-505.7)       | 426.3 (263.2-512.6)       | 320.0 (260.2-456.4)        | 0.21         |
| FLNH          | 26.0 (11.8-58.5)          | 26.2 (11.9-58.5)          | 15.8 (9.1-42.0)            | 0.44         |
| DFLNH         | 28.1 (12.1-74.3)          | 28.0 (11.5-67.4)          | 28.3 (16.7-76.6)           | 0.86         |
| <b>FDSLNH</b> | <b>140.3 (20.8-270.6)</b> | <b>102.2 (18.3-237.9)</b> | <b>213.6 (107.1-337.3)</b> | <b>0.028</b> |
| DSLNH         | 31.4 (12.7-61.8)          | 29.1 (11.6-62.1)          | 33.7 (15.8-60.0)           | 0.62         |
| Total HMO     | 16650.0 (15344.7-17878.3) | 16725.9 (15434.2-18096.5) | 16237.7 (14883.9-17695.3)  | 0.35         |
| Sia HMO       | 2329.0 (1930.1-2836.4)    | 2335.1 (1934.2-2796.0)    | 2269.9 (1760.5-3169.8)     | 0.92         |
| Fuc HMO       | 14638.9 (13461.9-16231.6) | 14641.2 (13750.5-16277.2) | 13528.5 (11826.2-16182.3)  | 0.086        |
| Diversity     | 4.4 (2.9-6.1)             | 4.1 (2.9-6.2)             | 5.0 (2.8-6.0)              | 0.77         |

IQR = interquartile range; HMOs = human milk oligosaccharides; N = total number of mothers; n = number of mothers in each weight category. HMO with a significant unadjusted p value is in bold.

Title: Non-genetic mother-infant factors and Human milk oligossacharides composition/profile in breast milk of Ugandan mothers

First Author: Tonny Jimmy Owalla

**Supplementary Table 9: Median (IQR) HMO concentrations and Maternal BMI in Non-secretor Mothers**

| <b>HMO<br/>nmol/mL</b> | <b>Total (N=26)</b>        | <b>Normal (n=20)</b>           | <b>Overweight (n=6)</b>    | <b>Unadjusted<br/>p-value</b> |
|------------------------|----------------------------|--------------------------------|----------------------------|-------------------------------|
| 2'FL                   | 31.7 (21.0-69.8)           | 35.7 (23.5-67.6)               | 27.2 (17.8-98.0)           | 0.81                          |
| 3FL                    | 189.3 (130.8-<br>515.8)    | 235.6 (104.6-<br>553.2)        | 185.1 (178.6-<br>378.9)    | 0.81                          |
| LNnT                   | 870.1 (585.6-<br>1203.5)   | 870.1 (587.4-<br>1257.5)       | 760.0 (585.6-<br>914.7)    | 0.67                          |
| 3'SL                   | 692.7 (474.1-<br>1091.4)   | 692.7 (430.9-<br>1101.7)       | 850.0 (601.5-<br>1059.8)   | 0.86                          |
| DFLac                  | 56.1 (31.1-65.1)           | 53.4 (30.0-69.0)               | 59.2 (41.3-61.4)           | 0.63                          |
| 6'SL                   | 185.9 (149.7-<br>297.8)    | 185.9 (149.8-<br>336.9)        | 200.9 (65.9-243.9)         | 0.67                          |
| LNT                    | 1330.7 (905.1-<br>2293.9)  | 1330.7 (841.1-<br>1986.6)      | 1704.9 (964.6-<br>2426.7)  | 0.47                          |
| LNFP I                 | 91.5 (54.4-105.9)          | 90.1 (49.2-108.0)              | 97.5 (82.7-102.1)          | 0.90                          |
| LNFP II                | 2884.1 (1836.4-<br>3417.2) | 2884.1 (2356.9-<br>3360.9)     | 2626.8 (1836.4-<br>3507.9) | 0.95                          |
| LNFP III               | 93.8 (76.6-111.6)          | 89.9 (74.3-114.0)              | 98.0 (86.5-101.5)          | 0.81                          |
| LSTb                   | 183.8 (123.1-<br>230.0)    | 205.1 (150.6-<br>231.2)        | 131.2 (21.4-185.3)         | 0.11                          |
| LSTc                   | 41.3 (26.7-67.1)           | 41.3 (26.8-77.5)               | 48.1 (20.0-57.5)           | 0.81                          |
| DFLNT                  | 619.0 (121.3-<br>839.7)    | 663.6 (197.8-<br>852.8)        | 341.1 (80.4-834.7)         | 0.43                          |
| <b>LNH</b>             | <b>80.0 (37.7-155.1)</b>   | <b>109.7 (60.5-<br/>179.2)</b> | <b>36.4 (26.5-54.4)</b>    | <b>0.024</b>                  |
| DSLNT                  | 429.3 (315.3-<br>593.0)    | 425.9 (284.1-<br>610.7)        | 432.2 (346.2-<br>593.0)    | 0.76                          |
| FLNH                   | 21.0 (15.2-34.2)           | 21.0 (16.5-32.1)               | 19.5 (15.1-86.2)           | 0.86                          |

Title: Non-genetic mother-infant factors and Human milk oligossacharides composition/profile in breast milk of Ugandan mothers

First Author: Tonny Jimmy Owalla

|           |                        |                        |                        |      |
|-----------|------------------------|------------------------|------------------------|------|
| DFLNH     | 9.5 (7.7-22.8)         | 10.1 (7.8-21.1)        | 8.3 (6.7-144.1)        | 0.95 |
| FDSLNH    | 216.3 (21.2-554.2)     | 338.5 (21.1-588.0)     | 90.5 (38.4-247.4)      | 0.36 |
| DSLNH     | 31.3 (7.9-77.4)        | 31.6 (7.9-81.8)        | 29.4 (6.8-35.7)        | 0.50 |
| Total HMO | 8988.5 (8159.9-9535.5) | 9246.0 (8373.8-9568.8) | 8450.6 (7941.6-8965.8) | 0.13 |
| Sia HMO   | 2984.1 (2380.1-3986.7) | 3132.0 (2631.3-4261.7) | 2395.0 (2311.8-2901.2) | 0.10 |
| Fuc HMO   | 5611.3 (3099.0-5958.7) | 5611.3 (4120.2-5922.5) | 4422.9 (3009.3-5966.2) | 0.76 |
| Diversity | 5.3 (4.6-5.9)          | 5.3 (4.9-5.9)          | 4.6 (4.6-5.4)          | 0.13 |

IQR = interquartile range; HMOs = human milk oligosaccharides; N = total number of mothers; n = number of mothers in each weight category. HMO with a significant unadjusted p value is in bold.
